# Supplementary material for: Feasibility of Combining Functional Mobilisation with Resistance and Endurance Training for Mechanically Ventilated Patients in Intensive Care Unit Setting—A Pilot Study
Source: MDPI journal article supplement (doi:10.3390/jcm13082412), 2024-04-20
Supplement: s1 [file s1]

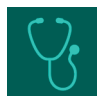

## Supplementary Materials

**Table S1.** Table Contraindications S1.

|                                                                                                                                                                                                                                                                                                                                                                                                                                                                                                                                  |
|----------------------------------------------------------------------------------------------------------------------------------------------------------------------------------------------------------------------------------------------------------------------------------------------------------------------------------------------------------------------------------------------------------------------------------------------------------------------------------------------------------------------------------|
| <b><u>Check for contraindication:</u></b>                                                                                                                                                                                                                                                                                                                                                                                                                                                                                        |
| <b>Cardiovascular</b>                                                                                                                                                                                                                                                                                                                                                                                                                                                                                                            |
| <ul style="list-style-type: none"><li>• Heart rate &gt; 100 bpm or Heart rate change of 20 beats from baseline</li><li>• Hypotension, MAP &lt; 65 or Hypertension, MAP &gt; 110 mmHg</li><li>• On inotropes support (noradrenaline &gt; 0.05 mcg/kg/minute, vasopressin &gt; 1.2 units/hour dopamine &gt; 4 mcg/kg/minute or more than one inotrope)</li><li>• Abnormal ECG (e.g., presence of unstable arrhythmias or myocardial infarction) in the last 24 hours</li><li>• Intravenous Glyceryl Trinitrate/Labetalol</li></ul> |
| <b>Respiratory system</b>                                                                                                                                                                                                                                                                                                                                                                                                                                                                                                        |
| <ul style="list-style-type: none"><li>• SpO<sub>2</sub> &lt; 92%</li><li>• Pao<sub>2</sub>/ Fio<sub>2</sub> ratio &lt; 200</li><li>• Respiratory Rate &gt; 30 breaths per minute</li><li>• PEEP &gt; 10</li><li>• FiO<sub>2</sub> &gt; 50%</li></ul>                                                                                                                                                                                                                                                                             |
| <b>Laboratory investigations</b>                                                                                                                                                                                                                                                                                                                                                                                                                                                                                                 |
| <ul style="list-style-type: none"><li>• Hemoglobin &lt; 7</li><li>• Platelets &lt; 50</li><li>• INR out of therapeutic range</li><li>• Blood glucose &lt; 4 mmol/L or &gt; 20 mmol/L</li><li>• Severe electrolyte derangements</li></ul>                                                                                                                                                                                                                                                                                         |
| <b>Neurological contraindications</b>                                                                                                                                                                                                                                                                                                                                                                                                                                                                                            |
| <ul style="list-style-type: none"><li>• Unstable ICP and exceeds 15 mmHg in past 24 hours</li><li>• EVD output &gt; 100 ml in 24 hours; bloody EVD output; EVD lower than 10 cm H<sub>2</sub>O above tragus of ear</li></ul>                                                                                                                                                                                                                                                                                                     |
| <b>Orthopaedic contraindications</b>                                                                                                                                                                                                                                                                                                                                                                                                                                                                                             |
| <ul style="list-style-type: none"><li>• Spinal fractures, patient on spinal nursing, lower limb fractures awaiting fixation</li></ul>                                                                                                                                                                                                                                                                                                                                                                                            |
| <b>Vascular conditions</b>                                                                                                                                                                                                                                                                                                                                                                                                                                                                                                       |
| <ul style="list-style-type: none"><li>• Untreated deep vein thrombosis / Pulmonary Embolism</li><li>• Severe limb ischemia/</li><li>• Active bleeding</li><li>• Any untreated aneurysm</li><li>• On intravenous Heparin</li></ul>                                                                                                                                                                                                                                                                                                |
| <b>Surgical issues or medical procedures</b>                                                                                                                                                                                                                                                                                                                                                                                                                                                                                     |
| <ul style="list-style-type: none"><li>• Attachments that contraindicate mobilisation (e.g., femoral sheaths, IABP, Swan-Ganz catheter, temporary pacing wire)</li><li>• Ordered Complete Rest In Bed due to medical issues/recent removal of invasive attachments</li><li>• Open abdomen</li></ul>                                                                                                                                                                                                                               |
| <b>Others</b>                                                                                                                                                                                                                                                                                                                                                                                                                                                                                                                    |
| <ul style="list-style-type: none"><li>• Body temperature &gt; 39°C</li></ul>                                                                                                                                                                                                                                                                                                                                                                                                                                                     |

- 
- RASS score less than -1 or more than 2
- 

MAP – Mean arterial pressure; PaO<sub>2</sub> – Partial pressure of oxygen; Fio<sub>2</sub> – Fraction of inspiratory oxygen concentration; PEEP – Positive end expiratory pressure; INR –International normalized ratio; ICP – intra cranial pressure; EVD – Extra ventricular drainage; RASS-Richmond agitation sedation score.
